# Supplementary material
Source: PubMed Central journal article supplement (PMC11099535)
Supplement: NIHMS1991153-supplement-Figure_S2.pdf [file NIHMS1991153-supplement-Figure_S2.pdf]

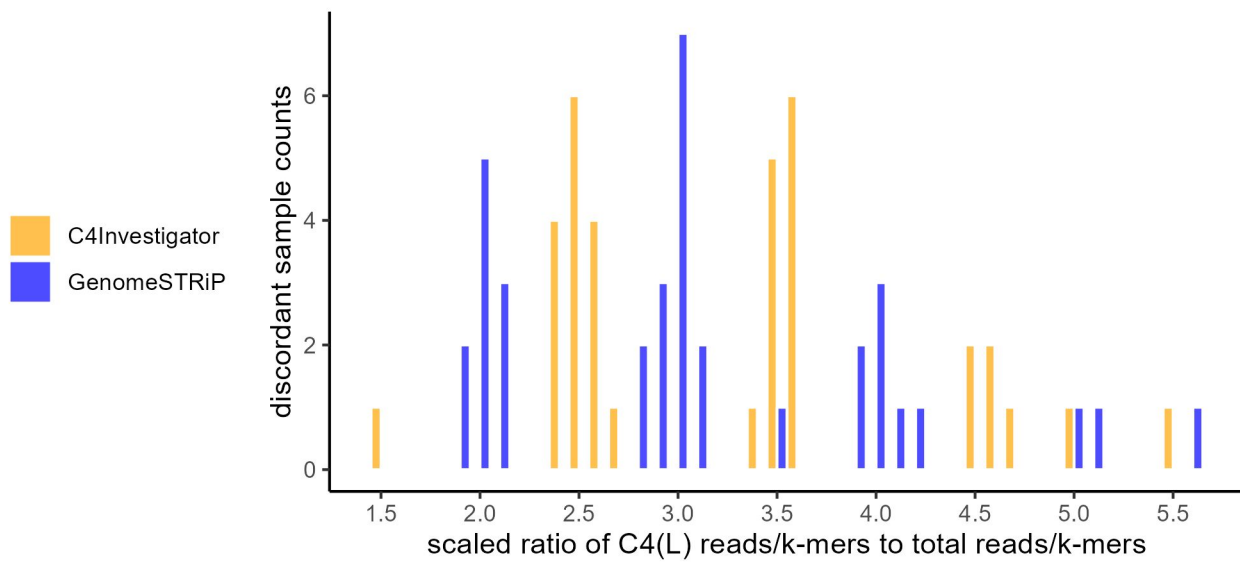

**Figure S2.** Histogram of ratios of C4(L) read/k-mer counts to total C4 read/k-mer counts, scaled by total *C4A* and *C4B* copy, for the C4Investigator and GenomeSTRiP workflows for C4(L)/C4(S) discordant samples from the 1000 Genomes Project dataset.
